# Supplementary material
Source: Springer Nature journal article supplement (https://www.springermedizin.de/resource/supplementary/12891_2007_511_MOESM1_ESM.pdf/9511206)
Supplement: MOESM1 [file 9511206]

Baseline

10-week follow-up

9-month follow-up

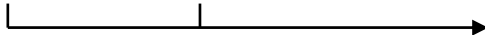

Self-efficacy intervention

0000000000

0

Ergonomic education intervention

0 0
